# Supplementary material
Source: publisher site journal article supplement (https://www.dovepress.com/get_supplementary_file.php?f=315143.docx)
Supplement: Supplementary file 1 [file get_supplementary_file.php]

SUPPLEMENTARY MATERIAL

Appendix 1: Modifications of medical therapy during follow-up (page 2)

Appendix 2: Correlations (page 3-4)

| **Appendix 1: Modifications of medical therapy during follow-up** | | |
| --- | --- | --- |
|  | **Anti-hypertensive medication** | **Anti-diabetic medication** |
|  |  |  |
| **1 month** | **Dose increases**  -  **Dose reductions**  - Discontinued ACE-inhibitor (n=1)  - Discontinued thiazides (n=1)  - Calcium-blocker dose reduction (n=1)  - ACE-inhibitor dose reduction (n=1) | **Dose increases**  - Insulin dose increase (n=3)  **Dose reductions**  - Discontinued insulin therapy (n=1)  - Discontinued metformin (n=1) |
| **3 months** | **Dose increases**  - ACE-inhibitor dose increase (n=1)  - Calcium-blocker dose increase (n=1)  **Dose reductions**  - Discontinued ACE-inhibitor (n=1)  - Discontinued calcium-blocker (n=1) | **Dose increases**  - Insulin dose increase (n=5)  - Switched from metformin to insulin (n=1)  **Dose reductions**  - |
| **6 months** | **Dose increases**  - Initiated loop-diuretics (n=1)  - Loop-diuretic dose increase (n=2)  - Calcium-blocker dose increase (n=1)  **Dose reductions**  - Discontinued thiazides (n=1)  - Discontinued beta-blockers (n=1)  - Calcium-blocker dose reduction (n=1) | **Dose increases**  - Insulin dose increase (n=3)  **Dose reductions**  - Insulin dose reduction (n=2)  - Discontinued GLP-1 analogue (n=1)  - Discontinued metformin (n=1)  - Metformin dose reduction (n=1) |

| **Appendix 2: Correlations** | | | |
| --- | --- | --- | --- |
| **Baseline correlations** | | | |
| **Variable 1** | **Variable 2** | **Coefficient** | **Interpretation** |
| Baseline albuminuria | Systolic blood pressure | 0.391, p=0.0401 | Baseline albuminuria was higher in patients with high baseline systolic blood pressure |
| Baseline albuminuria | Diastolic blood pressure | 0.494, p=0.0071 | Baseline albuminuria was higher in patients with high baseline diastolic blood pressure |
| Baseline albuminuria | Mean blood pressure | 0.462, p=0.0131 | Baseline albuminuria was higher in patients with high baseline mean blood pressure |
| Baseline NOx | Baseline GFR | 0.421, p=0.0261 | Baseline GFR was higher in patients with high baseline NOx |
| Baseline NOx | Baseline albuminuria | -0.535, p=0.0042 | Baseline albuminuria increased exponentially in patients with low baseline NOx |
| Baseline VEGF | Baseline albuminuria | 0.425, p=0.0242 | Baseline albuminuria increased exponentially in patients with high baseline VEGF |
| Baseline VEGF | Baseline NOx | -0.459, p=0.0142 | Baseline NOx increased exponentially in patients with low baseline VEGF |
|  |  |  |  |
| **Outcome correlations** | | | |
| **Variable 1** | **Variable 2** | **Coefficient** | **Interpretation** |
| Change in VEGF at 1st treatment | Change in NOx at 1st treatment | 0.457, p=0.0161 | At 1st treatment session, NOx increased in patients with increasing VEGF |
| Change in VEGF at 1st treatment | Change in GFR after 3 months | 0.410, p=0.0342 | GFR increased after 3 months in patients with increasing VEGF at 1st treatment session |
| Change in VEGF at 1st treatment | Change in GFR after 6 months | 0.417, p=0.0342 | GFR increased after 6 months in patients with increasing VEGF at 1st treatment session |
| Change in VEGF at 6th treatment | Change in GFR after 6 months | 0.557, p=0.0032 | GFR increased after 6 months in patients with increasing VEGF at 6th treatment session |
| Change in VEGF after 1 month | Change in GFR after 6 months | 0.537, p=0.0102 | GFR increased after 6 months in patients with increasing VEGF after 1 month |
| Duration of DM | Change in GFR after 3 months | -0.458, p=0.0161 | Patients with long duration of DM had poorer GFR outcome after 3 months |
|  |  |  |  |
| **Correlations between baseline and outcome** | | | |
| **Variable 1** | **Variable 2** | **Coefficient** | **Interpretation** |
| Baseline NOx | Change in NOx at 1st treatment | -0.821, p=0.0001 | NOx was increasing at 1st treatment session in patients with low baseline NOx |
| Baseline NOx | Change in NOx at 6th treatment | -0.593, p=0.0011 | NOx was increasing at 6th treatment session in patients with low baseline NOx |
| Baseline NOx | Change in NOx after 1 month | -0.843, p=0.0001 | NOx was increasing after 1 month in patients with low baseline NOx |
| Baseline NOx | Change in NOx after 3 months | -0.620, p=0.0011 | NOx was increasing after 3 months in patients with low baseline NOx |
| Baseline NOx | Change in NOx after 6 months | -0.774, p=0.0001 | NOx was increasing after 6 months in patients with low baseline NOx |
| Baseline VEGF | Change in VEGF after 1 month | -0.683, p=0.0001 | VEGF was increasing after 1 month in patients with low baseline VEGF |
| Baseline calbindin | Change in calbindin at 6th treatment | -0.586, p=0.0021 | Calbindin was decreasing at 6th treatment session in patients with high baseline calbindin |
| Baseline calbindin | Change in calbindin after 1 month | -0.445, p=0.0231 | Calbindin was decreasing after 1 month in patients with high baseline calbindin |
| Baseline calbindin | Change in calbindin after 3 months | -0.682, p=0.0001 | Calbindin was decreasing after 3 months in patients with high baseline calbindin |
| Baseline calbindin | Change in calbindin after 6 months | -0.622, p=0.0011 | Calbindin was decreasing after 6 months in patients with high baseline calbindin |
| Baseline clusterin | Change in clusterin after 6th treatment | -0.478, p=0.0101 | Clusterin was decreasing at 6th treatment session in patients with high baseline clusterin |
| Baseline clusterin | Change in clusterin after 1 month | -0.567, p=0.0021 | Clusterin was decreasing after 1 month in patients with high baseline clusterin |
| Baseline KIM-1 | Change in KIM-1 at 1st treatment | -0.593, p=0.0011 | KIM-1 was decreasing at 1st treatment session in patients with high baseline KIM-1 |
| Baseline KIM-1 | Change in KIM-1 after 1 month | -0.577, p=0.0011 | KIM-1 was decreasing after 1 month in patients with high baseline KIM-1 |
| Baseline osteoactivin | Change in osteoactivin at 1st treatment | -0.518, p=0.0061 | Osteoactivin was decreasing at 1st treatment session in patients with high baseline osteoactivin |
| Baseline osteoactivin | Change in osteoactivin at 6th treatment | -0.405, p=0.0331 | Osteoactivin was decreasing at 6th treatment session in patients with high baseline osteoactivin |
| Baseline TFF3 | Change in TFF3 at 1st treatment | -0.583, p=0.0141 | TFF3 was decreasing at 1st treatment session in patients with high baseline TFF3 |
| 1Pearson coefficient (linear relationship between the variables)  2Spearman coefficient (non-linear relationship between the variables) | | | |
